# Supplementary material
Source: publisher figshare collection journal article supplement (https://aacr.figshare.com/articles/dataset/_/23905313)
Supplement: Supplementary file 1 [file 41911499]

Supplemental Figure 11. Differential expression between patients with no 1q gain and those with a gain(1q:CKS1B). A. All genes that are differentially expressed

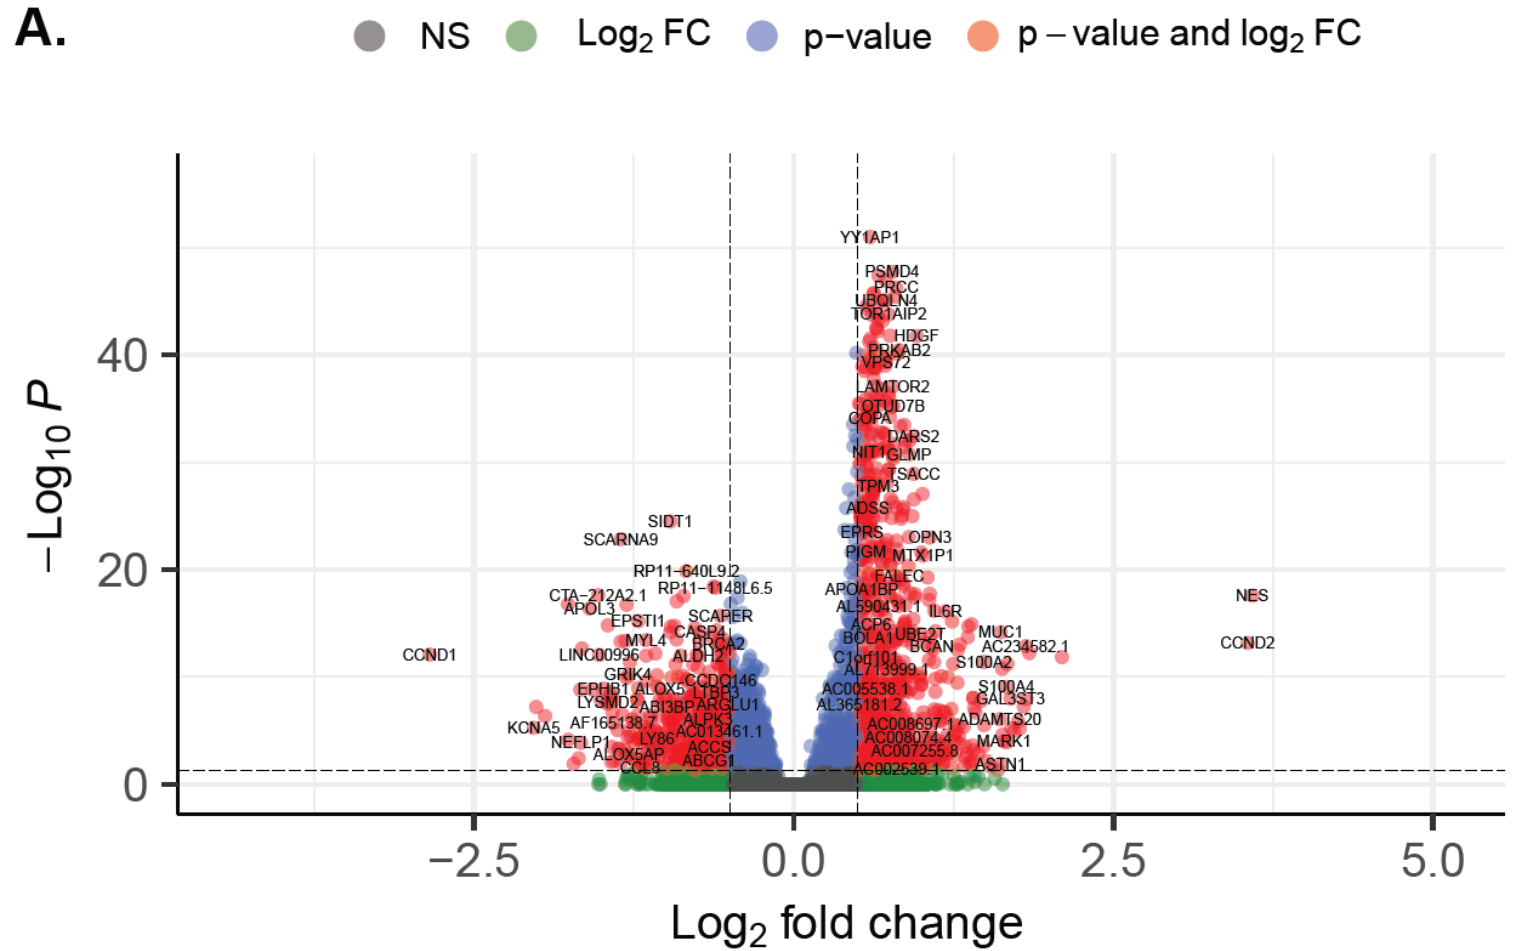

total = 56758 variables

**Supplemental Figure 11. Differential expression between patients with no 1q gain and those with a gain(1q:CKS1B). B. Genes on chr1 that are differentially expressed**

**B.**

● NS ● Log<sub>2</sub> FC ● p-value ● p-value and log<sub>2</sub> FC

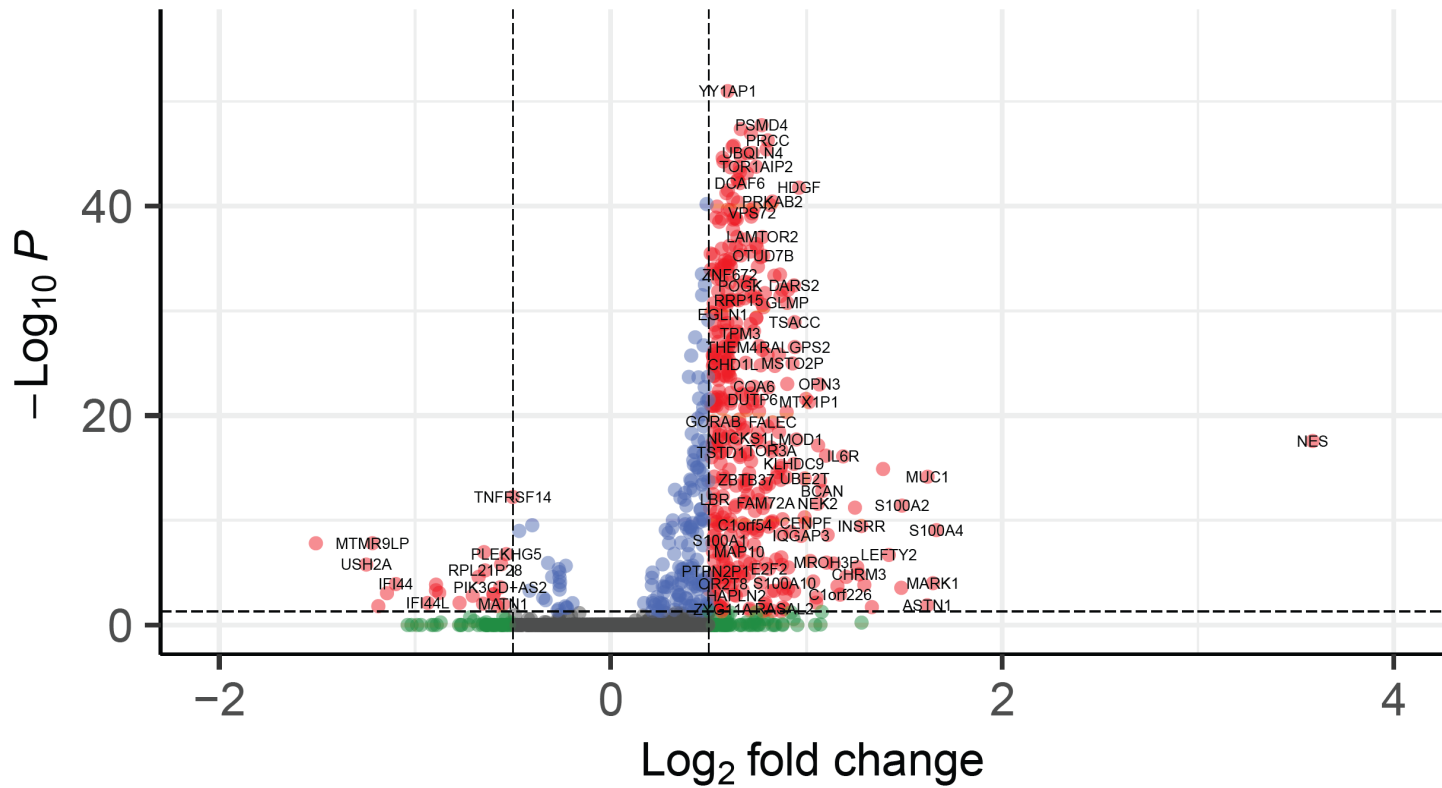

total = 3083 variables

**Supplemental Figure 11. Differential expression between patients with no 1q gain and those with a gain(1q:CKS1B). C.**  
 Location on chromosome 1 of differentially expressed genes.

**C.**

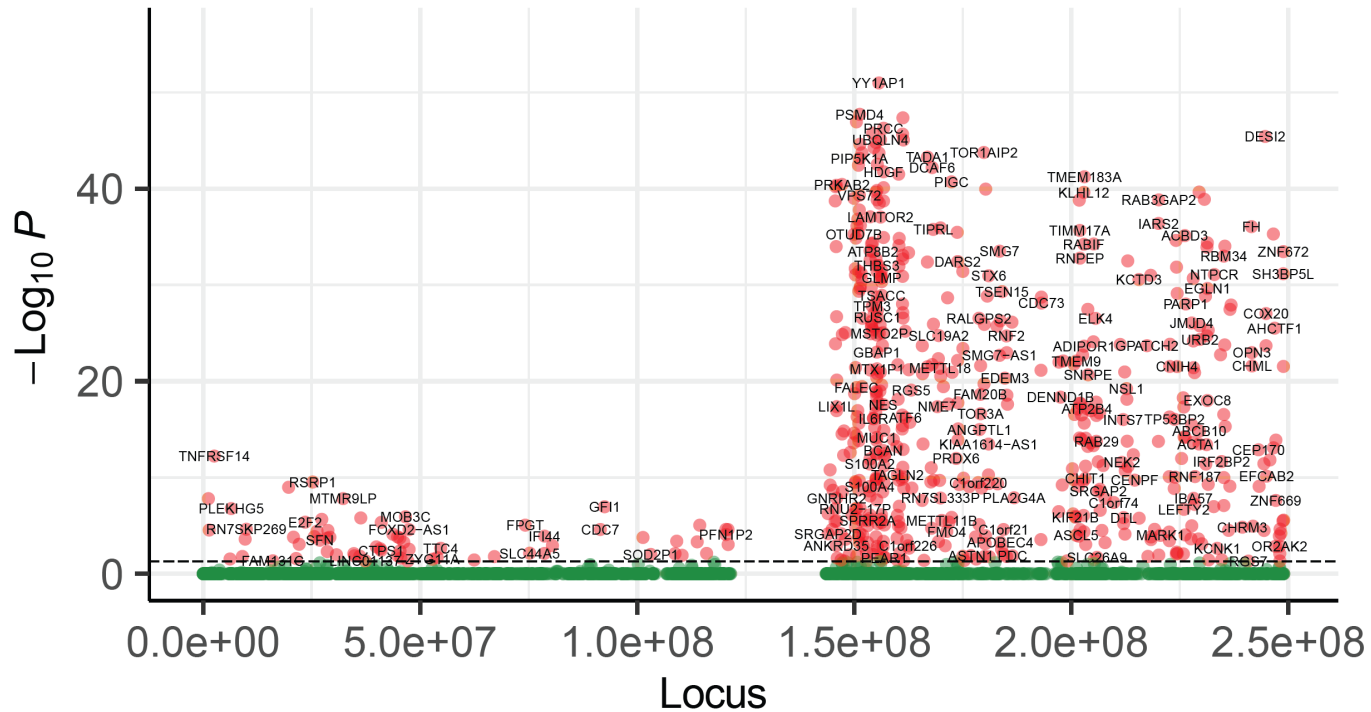

total = 3083 variables
